# Supplementary material
Source: publisher figshare collection journal article supplement (https://tandf.figshare.com/articles/dataset/_/8812886)
Supplement: Supplementary file 1 [file 1]

Archive with 2 entries (2 files):
- uoeh_a_1628966_sm8659.pdf
- uoeh_a_1628966_sm8650.docx
